# Supplementary material for: Synthesis of flower-like BaTiO3/Fe3O4 hierarchically structured particles and their electrorheological and magnetic properties
Source: Royal Society of Chemistry journal article supplement (doi:10.1039/c3dt50504a), 2013-01-01
Supplement: c3dt50504a.pdf [file c3dt50504a.pdf]

## *Supporting Information*

# **Synthesis of Flower-like BaTiO<sub>3</sub>/Fe<sub>3</sub>O<sub>4</sub> Hierarchical Structure Particles and Their Electro-rheological and Magnetic Properties**

**Baoxiang Wang<sup>1,2,\*</sup>, Yichao Yin<sup>1</sup>, Chenjie Liu<sup>1</sup>, Shoushan Yu<sup>1</sup>, Kezheng Chen<sup>1,\*</sup>**

**(1. College of Materials Science and Engineering,**

**Qingdao University of Science and Technology, Qingdao 266042, China**

**2. State Key Laboratory of Polymer Materials Engineering, Sichuan University,  
Chengdu 610065, China)**

**\*To whom correspondence should be addressed. Tel: 86-532-84022509.**

**Fax: 86-532-84022509. E-Mail: bxwang@qust.edu.cn; kchen@qust.edu.cn.**

Table S1 The main elementary composition of BaTiO<sub>3</sub>/Fe<sub>3</sub>O<sub>4</sub> hierarchical particles obtained under different solvothermal time:

a) 0.5h, b) 1h, c) 6h, d)12h, e)72h

| Element | Weight% | Atomic% |
|---------|---------|---------|
| C K     | 16.15   | 30.55   |
| O K     | 15.24   | 21.64   |
| Si K    | 53.50   | 43.28   |
| Ti K    | 0.56    | 0.26    |
| Fe K    | 7.69    | 3.13    |
| Ba L    | 6.87    | 1.14    |
| Totals  | 100.00  |         |

| Element | Weight% | Atomic% |
|---------|---------|---------|
| C K     | 21.01   | 38.53   |
| O K     | 28.50   | 39.24   |
| Si K    | 15.34   | 12.03   |
| Ti K    | 0.32    | 0.15    |
| Fe K    | 19.05   | 7.51    |
| Ba L    | 15.78   | 2.53    |
| Totals  | 100.00  |         |

a)

| Element | Weight% | Atomic% |
|---------|---------|---------|
| C K     | 9.92    | 21.30   |
| O K     | 20.34   | 32.79   |
| Si K    | 36.15   | 33.20   |
| Ti K    | 2.89    | 1.55    |
| Fe K    | 19.63   | 9.07    |
| Ba L    | 11.08   | 2.08    |
| Totals  | 100.00  |         |

b)

| Element | Weight% | Atomic% |
|---------|---------|---------|
| C K     | 11.55   | 23.97   |
| O K     | 21.22   | 33.05   |
| Si K    | 36.18   | 32.09   |
| Ti K    | 3.41    | 1.78    |
| Fe K    | 15.53   | 6.93    |
| Ba L    | 12.10   | 2.19    |
| Totals  | 100.00  |         |

c)

| Element | Weight% | Atomic% |
|---------|---------|---------|
| C K     | 5.46    | 13.64   |
| O K     | 29.24   | 54.84   |
| Si K    | 3.24    | 3.46    |
| Ti K    | 11.51   | 7.21    |
| Fe K    | 30.74   | 16.52   |
| Ba L    | 19.81   | 4.33    |
| Totals  | 100.00  |         |

d)

e)

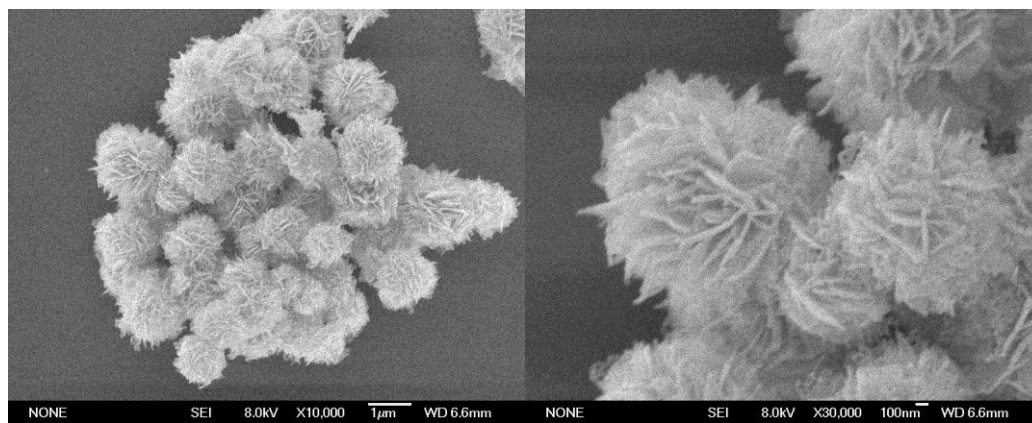

Figure S1. SEM images of iron alkoxide particles synthesized by refluxing the solution of  $\text{FeCl}_3 \cdot 6\text{H}_2\text{O}$ , urea, and surfactant in ethylene glycol.

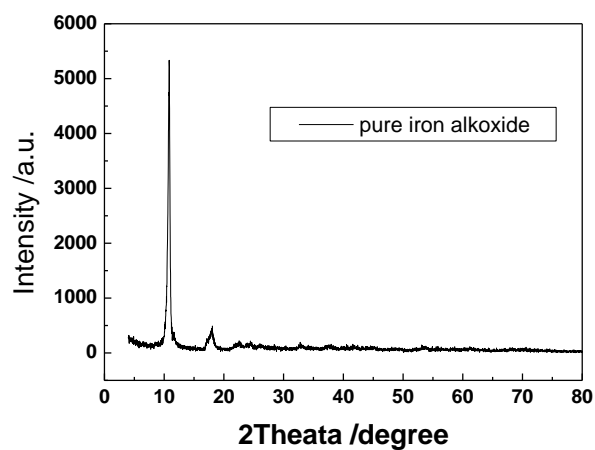

Figure S2. XRD patterns of iron alkoxide particles synthesized by refluxing the solution of  $\text{FeCl}_3 \cdot 6\text{H}_2\text{O}$ , urea, and surfactant in ethylene glycol.

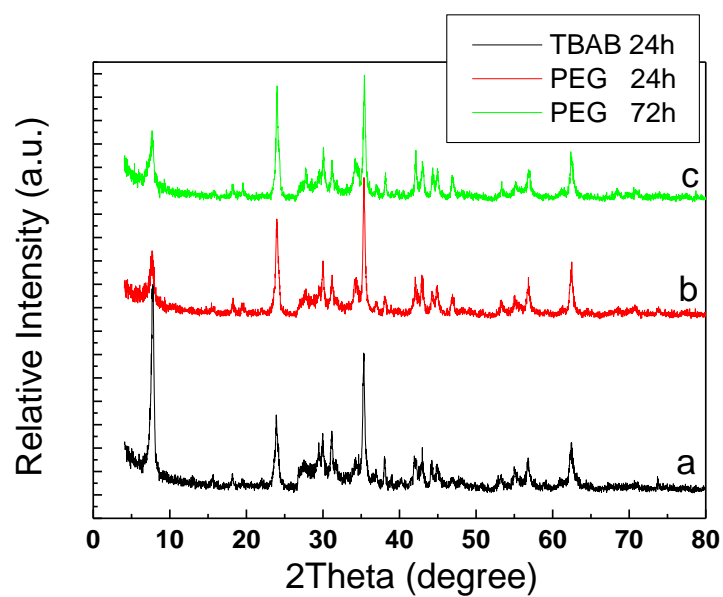

Fig.S3 XRD patterns of BaTiO<sub>3</sub>/Fe<sub>3</sub>O<sub>4</sub> particles prepared with different surfactant (a) TBAB, 24h (b) PEG, 24h (c) PEG, 72h

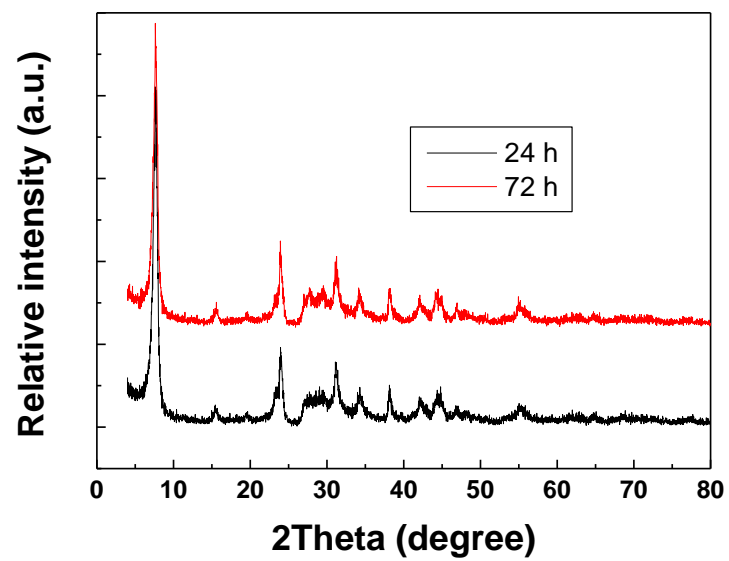

Figure S4 the XRD curves of pure BaTiO<sub>3</sub> particles via the same solvothermal method
